# Supplementary material for: Deep-red excimer emission from Ir doped organic light-emitting devices
Source: Royal Society of Chemistry journal article supplement (doi:10.1039/c3tc30452c), 2013-01-01
Supplement: c3tc30452c.pdf [file c3tc30452c.pdf]

## Electronic Supplementary Information for

### Deep--red excimer emission from Ir doped organic electroluminescent devices

Araceli Gutiérrez-Llorente<sup>1</sup>, Marta Mroz<sup>2</sup>, Juan Cabanillas-González<sup>2</sup>

<sup>1</sup>Departamento de Tecnología Electrónica, ESCET

Universidad Rey Juan Carlos, Calle Tulipán, s/n 28933 Madrid, Spain

<sup>2</sup>Instituto Madrileño de Estudios Avanzados (IMDEA-Nanociencia)

Cantoblanco, 28049 Madrid, Spain

Corresponding author: araceli.gutierrez@urjc.es

1. Influence of the concentration by weight of solutions on electroluminescence
2. UV-VIS absorption spectra of blended films
3. <sup>1</sup>H Nuclear Magnetic Resonance (NMR) spectrum of IrDBQ
4. Luminance – voltage and current density characteristics

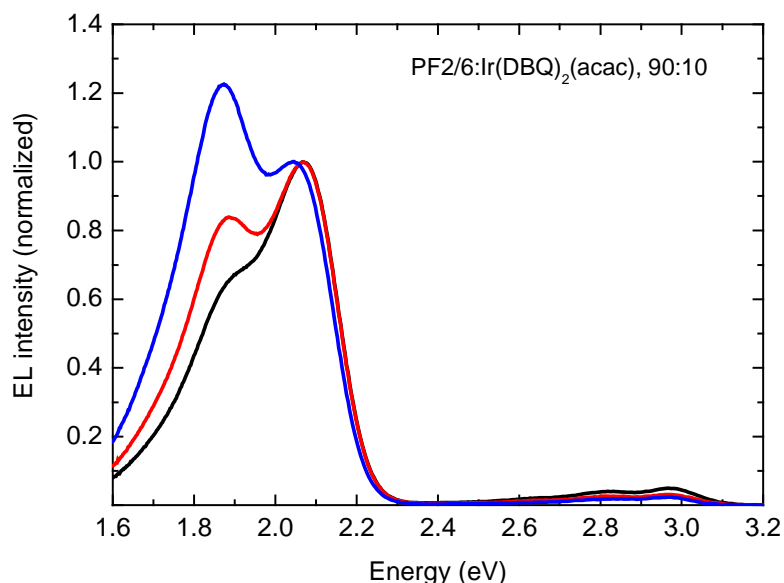

**Figure S1: Influence of the concentration by weight of PF26:IrDBQ solutions on electroluminescence.** EL spectra at room temperature of 90:10-PF26:Ir based devices with different emitting layer thickness. The diode structure was: ITO/PEDOT:PSS/PF26:Ir(90:10)/Ba/Al. The blended active layer was prepared from 2 wt.% (black), 3 wt.% (red) or 4 wt.% (blue) o-xylene solutions. EL spectra were measured under dc conditions at a constant current density of 100 mA/cm<sup>2</sup>. Electric field was 3 MV/cm<sup>2</sup>(2 wt.%), 2.6 MV/cm (3 wt.%) and 2.1 (4 wt.%) MV/cm. They are normalized at the highest energy peak.

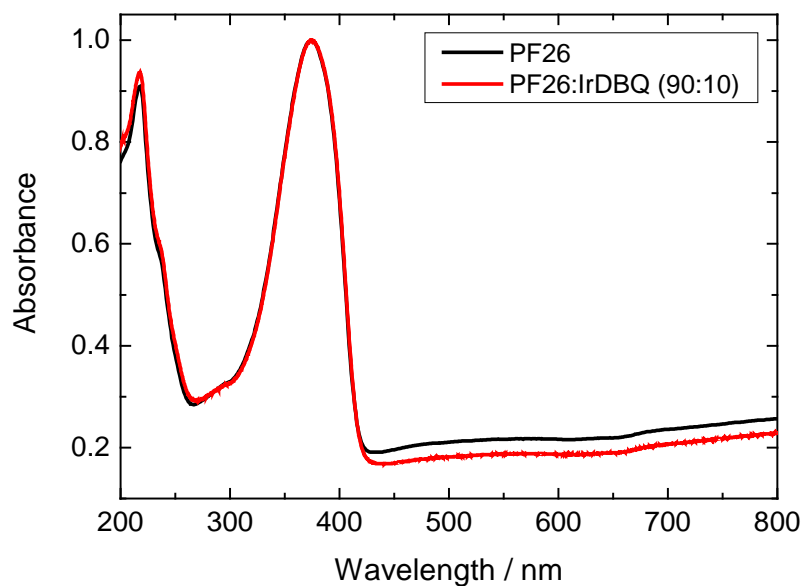

**Figure S2: UV-VIS absorption spectra of thin films of PF2/6 and PF2/6:IrDBQ (90:10).** Both films were deposited from 2%wt. ortho-xylene solutions by spin-coating on quartz substrates (SUPRASIL 2 grade B, from Heraeus).

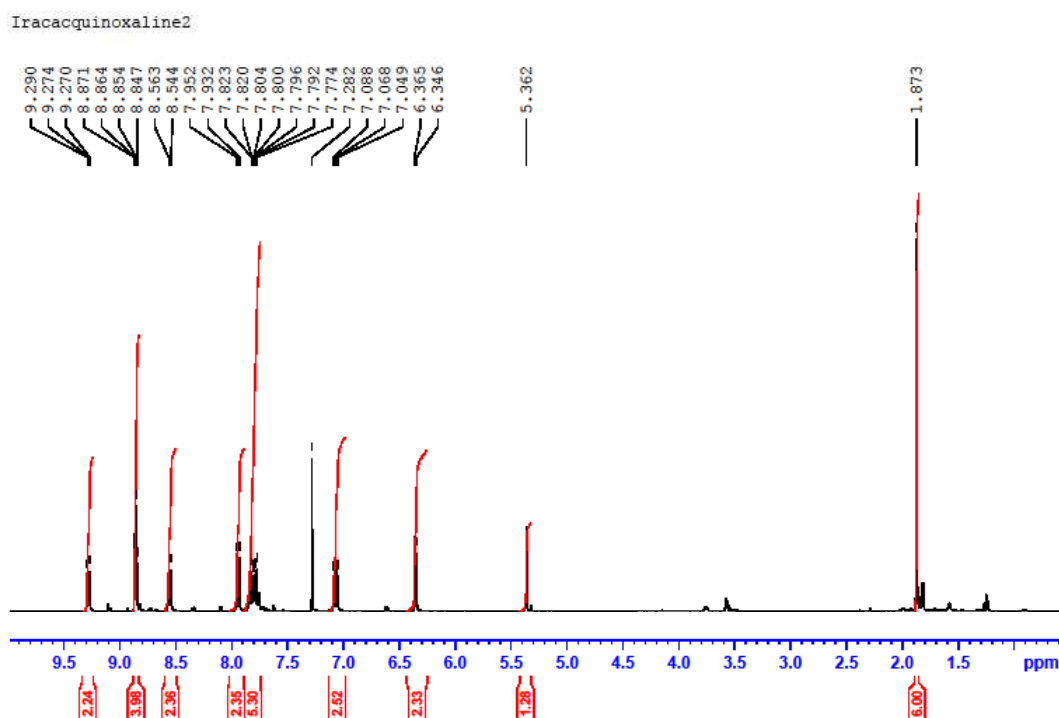

**Figure S3:  $^1\text{H}$  Nuclear Magnetic Resonance (NMR) spectrum:**  $^1\text{H}$  NMR (400MHz) spectrum of  $\text{Ir}(\text{DBQ})_2\text{acac}$  measured in deuterated chloroform ( $\text{CDCl}_3$ ). For each peak, integrated area is indicated in the bottom part of the spectrum. The same peaks reported by Duan et al. [*Adv. Mater.*, **15**(3), 2003, 224] are displayed.

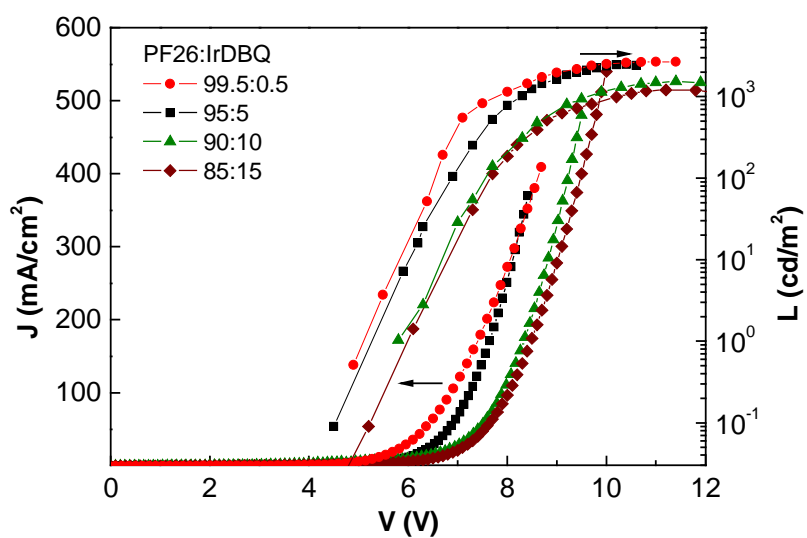

**Figure S4: Luminance – voltage and current density - voltage characteristics.** Emitting layers of devices are blends of PF26:IrDBQ with different doping ratios (0.5%, 5%, 10%, 15%). They were spin coated from 2% wt. o-xylene solutions.
